# Supplementary material for: Adsorption of heterocyclic sulfur and nitrogen compounds in liquid hydrocarbons on activated carbons modified by oxidation: capacity, selectivity and mechanism
Source: Royal Society of Chemistry journal article supplement (doi:10.1039/c6ra06108g), 2016-01-01
Supplement: c6ra06108g1.pdf [file c6ra06108g1.pdf]

## Adsorption of Heterocyclic Sulfur and Nitrogen Compounds in Liquid Hydrocarbons on Activated Carbons Modified by Oxidation: Capacity, Selectivity and Mechanism

Dong Qu<sup>a</sup>, Xiao Feng<sup>a</sup>, Na Li<sup>a\*</sup>, Xiaoliang Ma<sup>b\*</sup>, Chao Shang<sup>a</sup>, Xiao Dong Chen<sup>a</sup>

**Table S1.** Some properties of adsorbates.

| Adsorbate | Chemical structure                                                                  | Molar mass (g/mol) | Charge on S/N (a.u.) | Number of C (sp <sup>2</sup> ) atoms | Dipole magnitude (D) | Diameter (Å) |
|-----------|-------------------------------------------------------------------------------------|--------------------|----------------------|--------------------------------------|----------------------|--------------|
| Na        | 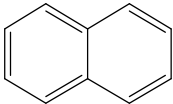   | 128                | -                    | 10                                   | 0.000                | 7.2          |
| Fl        |   | 166                | -                    | 12                                   | 0.370                | 7.5          |
| Qu        |  | 129                | -0.059               | 9                                    | 1.844                | 7.1          |
| In        |  | 117                | +0.288               | 10                                   | 2.004                | 7.2          |
| BT        |  | 134                | +0.261               | 9                                    | 1.090                | 6.9          |
| DBT       |  | 184                | +0.242               | 13                                   | 1.362                | 8.0          |

<sup>a</sup>critical diameter is defined as “the smallest diameter of a cylinder through which the molecule can pass without distortion”. Na: naphthalene; Fl: fluorene; Qu: quinoline; In: indole; BT: benzothiophene; DBT: dibenzothiophene.

**Table S2.** Composition of model fuel with different compounds.

| Chemicals | Purity | Molar concentration   | Concentration |               |
|-----------|--------|-----------------------|---------------|---------------|
|           | (wt %) | ( $\mu\text{mol/g}$ ) | (wt %)        | S or N (ppmw) |
| Na        | 99     | 10                    | 0.128         | -             |
| Fl        | 98     | 10                    | 0.166         | -             |
| Qu        | 98     | 10                    | 0.129         | 140           |
| In        | 99     | 10                    | 0.117         | 140           |
| BT        | 98     | 10                    | 0.134         | 320           |
| DBT       | 99     | 10                    | 0.184         | 320           |
| Heptane   | 97     | -                     | 99.142        | -             |
| Total     | -      | -                     | 100           | -             |

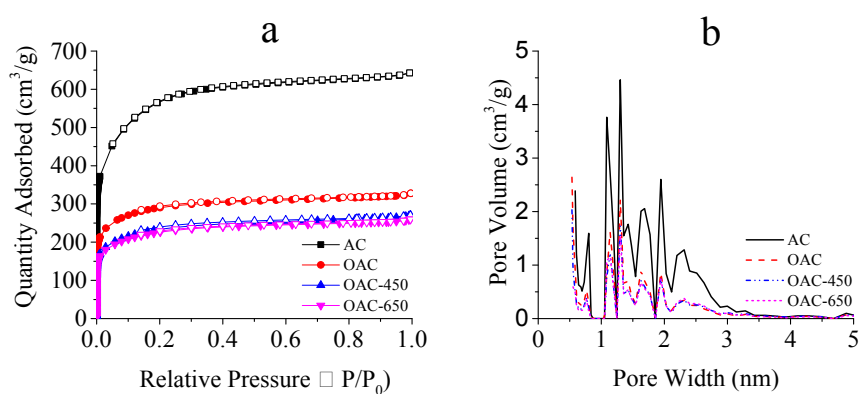**Figure S1.** a) Nitrogen adsorption-desorption isotherms and b) pore size distribution of the original and modified activated carbons.

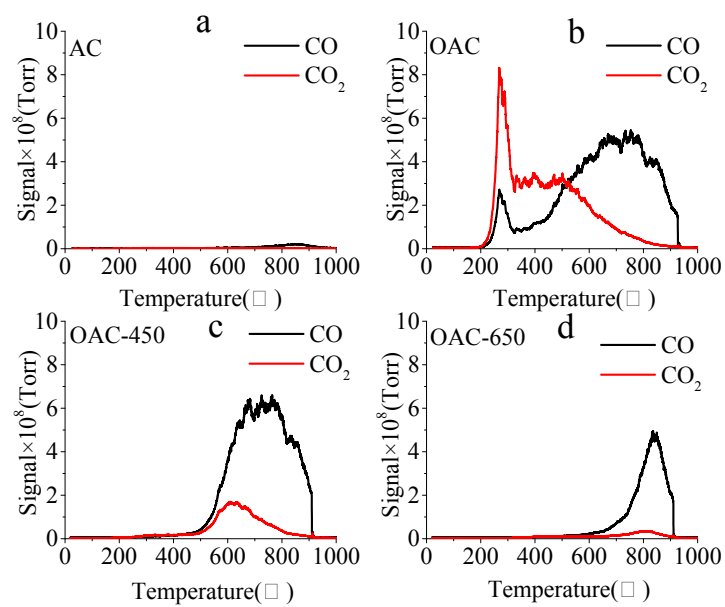

**Figure S2.** TPD-CO and TPD-CO<sub>2</sub> profiles of different activated carbons.
